# Supplementary material for: Antiproliferative and Cytotoxic Activity of Xanthohumol and Its Non-Estrogenic Derivatives in Colon and Hepatocellular Carcinoma Cell Lines
Source: MDPI journal article supplement (doi:10.3390/ijms20051203), 2019-03-09
Supplement: s1 [file s1]

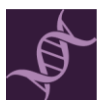

## Supplementary Materials

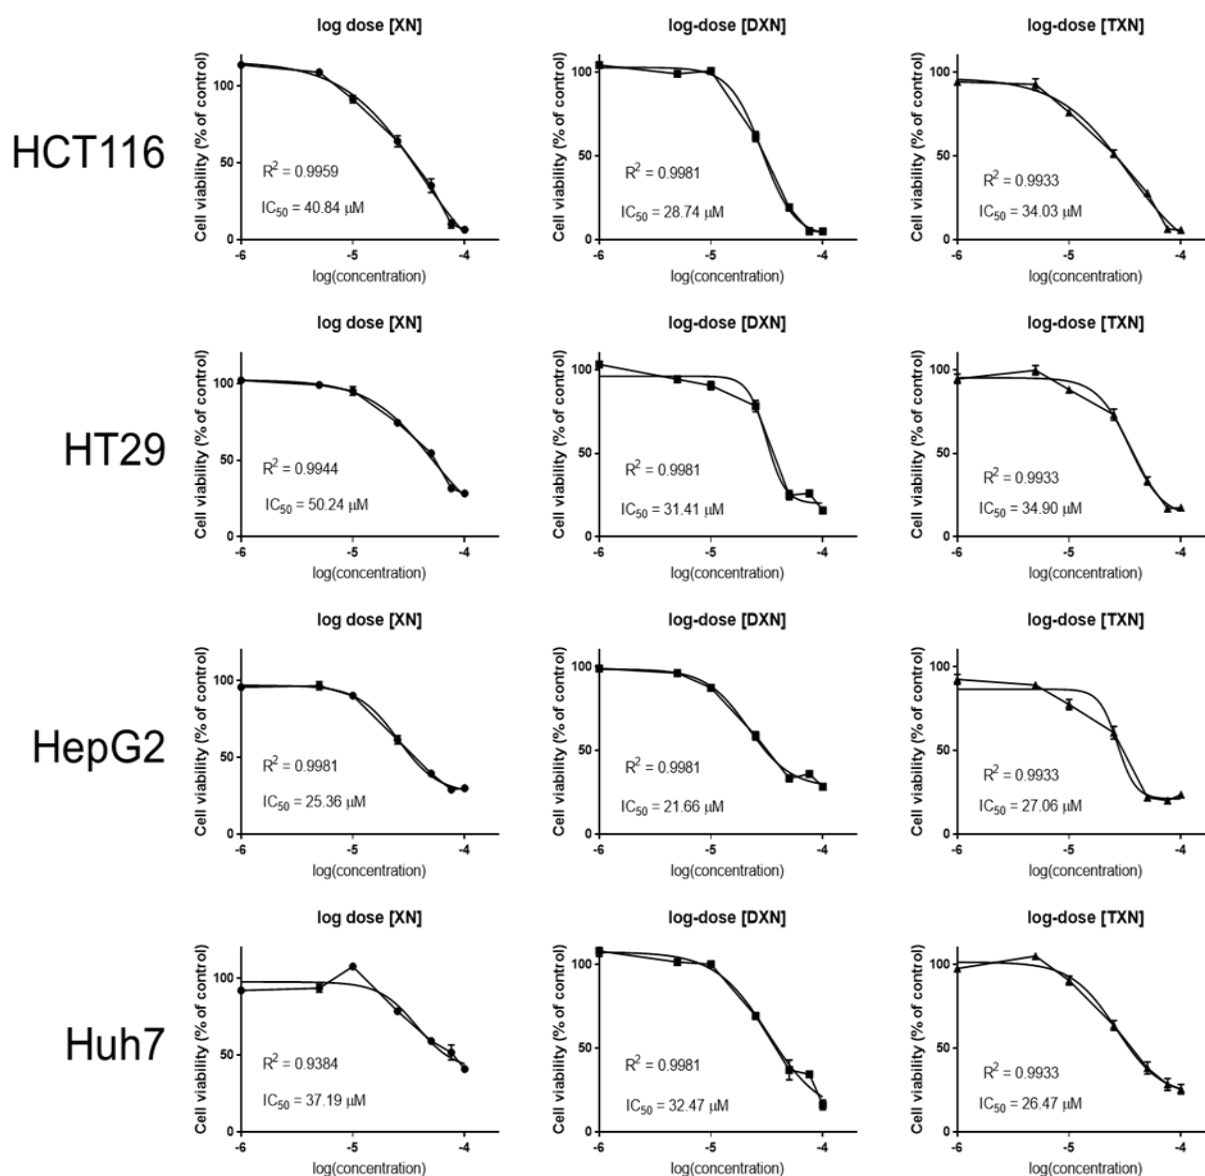

Figure S1. Comprehensive SRB assay results indicating cell viability curves,  $n = 5$  per dose.
